# Supplementary material
Source: HighWire-hosted journal article supplement (https://ajnr-sso.highwirestaging.com/highwire/filestream/52634/field_highwire_adjunct_files/0/14-01264.pdf)
Supplement: 14-01264.pdf [file 14-01264.pdf]

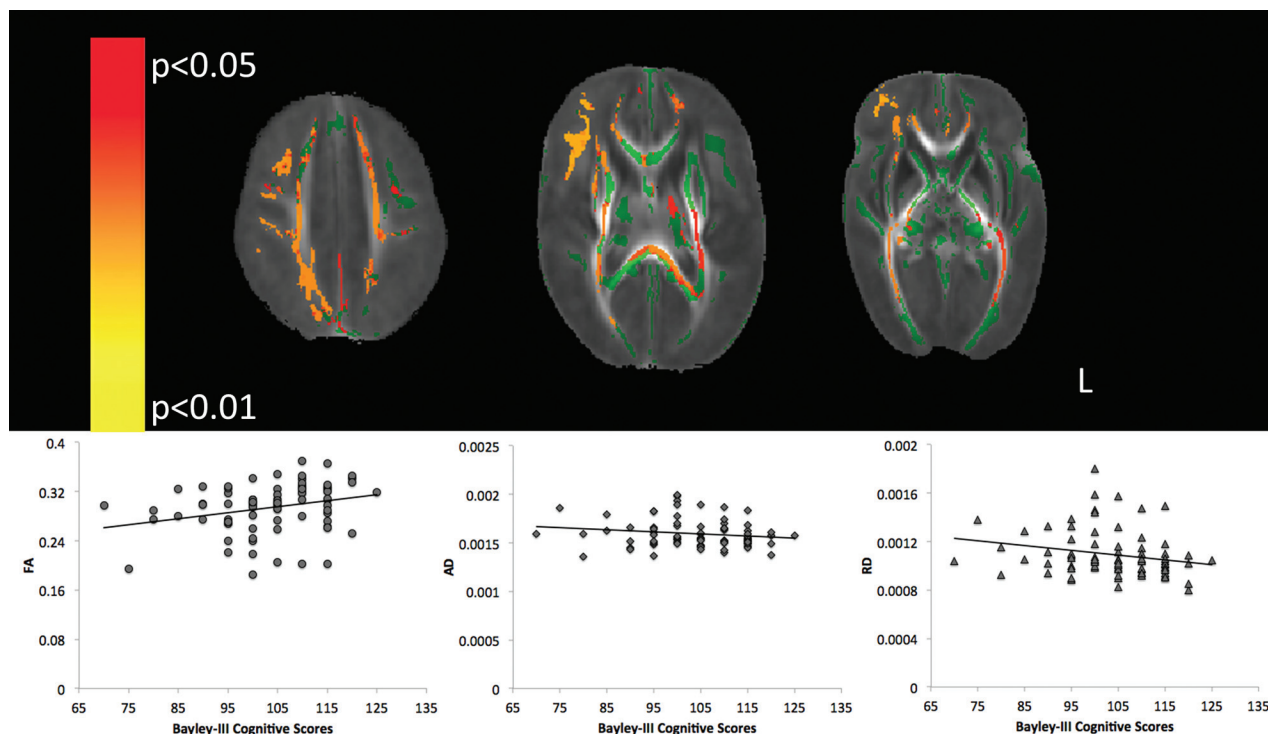

**ON-LINE FIG 1.** TBSS analysis of term scans acquired at a postmenstrual age of 37–41 weeks in preterm-born infants with no overt signs of brain injury including moderate/severe white matter injury and intraventricular hemorrhage. *Top:* Mean FA map (red-yellow) demonstrates the significant positive linear association between cognitive scores assessed with the Bayley-III and FA in the territory of the medial prefrontal cortex (*left*), the genu of the corpus callosum (*middle*), and portions of the inferior fronto-occipital fasciculus (*right*,  $P < .05$ , corrected for multiple comparisons). The mean FA skeleton is shown in green. *Bottom:* FA ( $R = 0.3, P = .005$ ), AD ( $R = -0.15, P = .18$ ), and RD ( $R = -0.26, P = .02$ ) values extracted from significant clusters in the FA map correlated with Bayley-III cognitive scores. The Spearman  $\rho$  correlation and an  $\alpha$  level are set at .05.
